# Supplementary material
Source: PubMed Central journal article supplement (PMC10274042)
Supplement: S1368980019002180sup001.pdf [file S1368980019002180sup001.pdf]

| Supplementary Material 1. Multiple hierarchical model to identify the factors associated with not initiating early breastfeeding in children aged under 24 months (N=6,592). Colombia, DHS 2010. |                  |                        |                   |                      |                        |                   |                    |                        |                   |                    |                        |                      |                    |  |
|--------------------------------------------------------------------------------------------------------------------------------------------------------------------------------------------------|------------------|------------------------|-------------------|----------------------|------------------------|-------------------|--------------------|------------------------|-------------------|--------------------|------------------------|----------------------|--------------------|--|
| Model 1 <sup>a</sup>                                                                                                                                                                             |                  |                        |                   | Model 2 <sup>b</sup> |                        |                   |                    | Model 3 <sup>c</sup>   |                   |                    |                        | Model 4 <sup>d</sup> |                    |  |
| Variable                                                                                                                                                                                         |                  | PR <sub>adjusted</sub> | 95% CI            | p                    | PR <sub>adjusted</sub> | 95% CI            | p                  | PR <sub>adjusted</sub> | 95% CI            | p                  | PR <sub>adjusted</sub> | 95% CI               | p                  |  |
| Income Quintile                                                                                                                                                                                  |                  |                        |                   |                      |                        |                   |                    |                        |                   |                    |                        |                      |                    |  |
|                                                                                                                                                                                                  | Poorest          | <b>1.00</b>            | ---               | ---                  | 1.00                   | ---               | ---                | 1.00                   | ---               | ---                | 1.00                   | ---                  | ---                |  |
|                                                                                                                                                                                                  | Poorer           | <b>1.15</b>            | <b>1.04; 1.27</b> | <b>0.005*</b>        | 1.08                   | 0.98; 1.20        | 0.12               | 0.99                   | 0.89; 1.10        | 0.865              | 0.98                   | 0.87; 1.11           | 0.789              |  |
|                                                                                                                                                                                                  | Middle           | <b>1.20</b>            | <b>1.08; 1.34</b> | <b>0.001**</b>       | 1.05                   | 0.93; 1.18        | 0.44               | 0.94                   | 0.84; 1.06        | 0.349              | 0.92                   | 0.81; 1.06           | 0.238              |  |
|                                                                                                                                                                                                  | Richer           | <b>1.22</b>            | <b>1.08; 1.38</b> | <b>0.001**</b>       | 1.10                   | 0.96; 1.26        | 0.175              | 0.96                   | 0.84; 1.09        | 0.505              | 0.97                   | 0.84; 1.12           | 0.669              |  |
|                                                                                                                                                                                                  | Richest          | <b>1.28</b>            | <b>1.11; 1.48</b> | <b>0.001**</b>       | 1.11                   | 0.94; 1.30        | 0.226              | 0.95                   | 0.81; 1.11        | 0.516              | 0.91                   | 0.76; 1.09           | 0.312              |  |
| Living with Partner Currently                                                                                                                                                                    |                  |                        |                   |                      |                        |                   |                    |                        |                   |                    |                        |                      |                    |  |
|                                                                                                                                                                                                  | Yes              | ---                    | ---               | ---                  | <b>1.00</b>            | ---               | ---                | 1.00                   | ---               | ---                | 1.00                   | ---                  | ---                |  |
|                                                                                                                                                                                                  | No               | ---                    | ---               | ---                  | <b>0.91</b>            | <b>0.83; 1.00</b> | <b>0.050*</b>      | 0.92                   | 0.84; 1.01        | 0.067              | 0.89                   | 0.81; 0.99           | 0.029              |  |
| Maternal Education                                                                                                                                                                               |                  |                        |                   |                      |                        |                   |                    |                        |                   |                    |                        |                      |                    |  |
|                                                                                                                                                                                                  | Higher Education | ---                    | ---               | ---                  | <b>1.00</b>            | ---               | ---                | 1.00                   | ---               | ---                | 1.00                   | ---                  | ---                |  |
|                                                                                                                                                                                                  | Lower Education  | ---                    | ---               | ---                  | <b>0.81</b>            | <b>0.74; 0.89</b> | <b>&lt;0.001**</b> | 0.88                   | 0.80; 0.97        | 0.009              | 0.87                   | 0.77; 0.98           | 0.026              |  |
| Maternal Overweight/Obese                                                                                                                                                                        |                  |                        |                   |                      |                        |                   |                    |                        |                   |                    |                        |                      |                    |  |
|                                                                                                                                                                                                  | No               | ---                    | ---               | ---                  | <b>1.00</b>            | ---               | ---                | 1.00                   | ---               | ---                | 1.00                   | ---                  | ---                |  |
|                                                                                                                                                                                                  | Yes              | ---                    | ---               | ---                  | <b>1.09</b>            | <b>1.01; 1.17</b> | <b>0.031*</b>      | 0.99                   | 0.92; 1.07        | 0.826              | 1.03                   | 0.94; 1.12           | 0.562              |  |
| Pregnancy Intention                                                                                                                                                                              |                  |                        |                   |                      |                        |                   |                    |                        |                   |                    |                        |                      |                    |  |
|                                                                                                                                                                                                  | Then             | ---                    | ---               | ---                  | <b>1.00</b>            | ---               | ---                | 1.00                   | ---               | ---                | 1.00                   | ---                  | ---                |  |
|                                                                                                                                                                                                  | Later            | ---                    | ---               | ---                  | <b>1.03</b>            | <b>0.94; 1.12</b> | <b>0.562</b>       | 1.06                   | 0.97; 1.15        | 0.173              | 1.06                   | 0.96; 1.17           | 0.229              |  |
|                                                                                                                                                                                                  | No More          | ---                    | ---               | ---                  | <b>0.92</b>            | <b>0.83; 1.02</b> | <b>0.115</b>       | 0.99                   | 0.89; 1.09        | 0.816              | 1.08                   | 0.96; 1.22           | 0.201              |  |
| Skilled Attendant at Birth                                                                                                                                                                       |                  |                        |                   |                      |                        |                   |                    |                        |                   |                    |                        |                      |                    |  |
|                                                                                                                                                                                                  | Yes              | ---                    | ---               | ---                  | ---                    | ---               | ---                | <b>1.00</b>            | ---               | ---                | 1.00                   | ---                  | ---                |  |
|                                                                                                                                                                                                  | No               | ---                    | ---               | ---                  | ---                    | ---               | ---                | <b>1.09</b>            | <b>1.01; 1.18</b> | <b>0.025*</b>      | 1.10                   | 1.01; 1.20           | 0.032              |  |
| C-Section                                                                                                                                                                                        |                  |                        |                   |                      |                        |                   |                    |                        |                   |                    |                        |                      |                    |  |
|                                                                                                                                                                                                  | No               | ---                    | ---               | ---                  | ---                    | ---               | ---                | <b>1.00</b>            | ---               | ---                | 1.00                   | ---                  | ---                |  |
|                                                                                                                                                                                                  | Yes              | ---                    | ---               | ---                  | ---                    | ---               | ---                | <b>2.08</b>            | <b>1.92; 2.25</b> | <b>&lt;0.001**</b> | 2.01                   | 1.84; 2.19           | <0.001             |  |
| Number Prenatal Visits                                                                                                                                                                           |                  |                        |                   |                      |                        |                   |                    |                        |                   |                    |                        |                      |                    |  |
|                                                                                                                                                                                                  | 4-9              | ---                    | ---               | ---                  | ---                    | ---               | ---                | <b>1.00</b>            | ---               | ---                | 1.00                   | ---                  | ---                |  |
|                                                                                                                                                                                                  | 0-3              | ---                    | ---               | ---                  | ---                    | ---               | ---                | <b>0.98</b>            | <b>0.88; 1.11</b> | <b>0.789</b>       | 1.02                   | 0.89; 1.17           | 0.794              |  |
|                                                                                                                                                                                                  | 10+              | ---                    | ---               | ---                  | ---                    | ---               | ---                | <b>1.15</b>            | <b>1.00; 1.32</b> | <b>0.056</b>       | 1.15                   | 0.99; 1.34           | 0.06               |  |
| Low Birth Weight                                                                                                                                                                                 |                  |                        |                   |                      |                        |                   |                    |                        |                   |                    |                        |                      |                    |  |
|                                                                                                                                                                                                  | No               | ---                    | ---               | ---                  | ---                    | ---               | ---                | ---                    | ---               | ---                | <b>1.00</b>            | ---                  | ---                |  |
|                                                                                                                                                                                                  | Yes              | ---                    | ---               | ---                  | ---                    | ---               | ---                | ---                    | ---               | ---                | <b>1.37</b>            | <b>1.20; 1.56</b>    | <b>&lt;0.001**</b> |  |
| Infant Sex                                                                                                                                                                                       |                  |                        |                   |                      |                        |                   |                    |                        |                   |                    |                        |                      |                    |  |
|                                                                                                                                                                                                  | Male             | ---                    | ---               | ---                  | ---                    | ---               | ---                | ---                    | ---               | ---                | <b>1.00</b>            | ---                  | ---                |  |
|                                                                                                                                                                                                  | Female           | ---                    | ---               | ---                  | ---                    | ---               | ---                | ---                    | ---               | ---                | <b>0.97</b>            | <b>0.89; 1.06</b>    | <b>0.498</b>       |  |
| First Child                                                                                                                                                                                      |                  |                        |                   |                      |                        |                   |                    |                        |                   |                    |                        |                      |                    |  |
|                                                                                                                                                                                                  | Not 1st          | ---                    | ---               | ---                  | ---                    | ---               | ---                | ---                    | ---               | ---                | <b>1.00</b>            | ---                  | ---                |  |
|                                                                                                                                                                                                  | 1st              | ---                    | ---               | ---                  | ---                    | ---               | ---                | ---                    | ---               | ---                | <b>1.23</b>            | <b>1.12; 1.35</b>    | <b>&lt;0.001**</b> |  |

<sup>a</sup> Model 1: Income quintile and infant age.  
<sup>b</sup> Model 2: Model 1 + mother living with partner, maternal education, maternal overweight/obese and pregnancy intention.  
<sup>c</sup> Model 3: Model 2 + skilled attendant at birth, c-section and number of prenatal visits.  
<sup>d</sup> Model 4: Model 3 + low infant birth weight, infant sex, and maternal primiparity.  
\*Significant at p <0.05  
\*\*Significant at p <0.001  
--- Reference category; no prevalence ratios or CI calculated.

**Supplementary Material 2.** Multiple hierarchical model to identify the factors associated with exclusive breastfeeding interruption in children aged under 6 months (N= 1,512). Colombia, DHS 2010.

| Model 1 <sup>a</sup>               |         |                        |                   | Model 2 <sup>b</sup> |                        |                   | Model 3 <sup>c</sup> |                        |                   | Model 4 <sup>d</sup> |                        |                   | Model 5 <sup>e</sup> |                        |                   |                    |
|------------------------------------|---------|------------------------|-------------------|----------------------|------------------------|-------------------|----------------------|------------------------|-------------------|----------------------|------------------------|-------------------|----------------------|------------------------|-------------------|--------------------|
| Variable                           |         | PR <sub>adjusted</sub> | 95%CI             | p                    | PR <sub>adjusted</sub> | 95%CI             | p                  |
| Income Quintile                    |         |                        |                   |                      |                        |                   |                      |                        |                   |                      |                        |                   |                      |                        |                   |                    |
|                                    | Poorest | <b>1.00</b>            | ---               | ---                  | 1.00                   | ---               | ---                  | 1.00                   | ---               | ---                  | 1.00                   | ---               | ---                  | 1.00                   | ---               | ---                |
|                                    | Poorer  | <b>1.21</b>            | <b>1.07; 1.35</b> | <b>0.002*</b>        | 1.21                   | 1.07; 1.37        | 0.002                | 1.12                   | 0.99; 1.27        | 0.075                | 1.15                   | 1.00; 1.33        | 0.051                | 1.13                   | 0.99; 1.30        | 0.077              |
|                                    | Middle  | <b>1.23</b>            | <b>1.08; 1.40</b> | <b>0.002*</b>        | 1.17                   | 1.02; 1.34        | 0.029                | 1.07                   | 0.93; 1.23        | 0.343                | 1.1                    | 0.93; 1.30        | 0.26                 | 1.06                   | 0.91; 1.24        | 0.475              |
|                                    | Richer  | <b>1.17</b>            | <b>1.00; 1.36</b> | <b>0.049*</b>        | 1.21                   | 1.04; 1.42        | 0.016                | 1.10                   | 0.93; 1.29        | 0.261                | 1.16                   | 0.97; 1.38        | 0.109                | 1.11                   | 0.94; 1.32        | 0.231              |
|                                    | Richest | <b>1.26</b>            | <b>1.04; 1.52</b> | <b>0.019*</b>        | 1.27                   | 1.04; 1.54        | 0.02                 | 1.15                   | 0.93; 1.41        | 0.194                | 1.23                   | 0.99; 1.53        | 0.063                | 1.21                   | 0.98; 1.51        | 0.077              |
| Number Adults in Household         |         |                        |                   |                      |                        |                   |                      |                        |                   |                      |                        |                   |                      |                        |                   |                    |
|                                    | 1-2     | <b>1.00</b>            | ---               | ---                  | 1.00                   | ---               | ---                  | 1.00                   | ---               | ---                  | 1.00                   | ---               | ---                  | 1.00                   | ---               | ---                |
|                                    | 3+      | <b>1.11</b>            | <b>1.00; 1.23</b> | <b>0.054</b>         | 1.12                   | 1.00; 1.26        | 0.041                | 1.13                   | 1.01; 1.27        | 0.029                | 1.14                   | 1.00; 1.29        | 0.045                | 1.12                   | 0.99; 1.27        | 0.062              |
| Living with Partner Currently      |         |                        |                   |                      |                        |                   |                      |                        |                   |                      |                        |                   |                      |                        |                   |                    |
|                                    | Yes     | ---                    | ---               | ---                  | <b>1.00</b>            | ---               | ---                  | 1.00                   | ---               | ---                  | 1.00                   | ---               | ---                  | 1.00                   | ---               | ---                |
|                                    | No      | ---                    | ---               | ---                  | <b>1.10</b>            | <b>0.99; 1.23</b> | <b>0.079</b>         | 1.1                    | 0.99; 1.23        | 0.069                | 1.12                   | 1.00; 1.27        | 0.056                | 1.12                   | 0.99; 1.26        | 0.076              |
| Maternal Overweight/Obese          |         |                        |                   |                      |                        |                   |                      |                        |                   |                      |                        |                   |                      |                        |                   |                    |
|                                    | No      | ---                    | ---               | ---                  | <b>1.00</b>            | ---               | ---                  | 1.00                   | ---               | ---                  | 1.00                   | ---               | ---                  | 1.00                   | ---               | ---                |
|                                    | Yes     | ---                    | ---               | ---                  | <b>1.05</b>            | <b>0.96; 1.15</b> | <b>0.294</b>         | 1.04                   | 0.94; 1.14        | 0.463                | 1.05                   | 0.94; 1.17        | 0.35                 | 1.04                   | 0.93; 1.15        | 0.518              |
| Pregnancy Intention                |         |                        |                   |                      |                        |                   |                      |                        |                   |                      |                        |                   |                      |                        |                   |                    |
|                                    | Then    | ---                    | ---               | ---                  | <b>1.00</b>            | ---               | ---                  | 1.00                   | ---               | ---                  | 1.00                   | ---               | ---                  | 1.00                   | ---               | ---                |
|                                    | Later   | ---                    | ---               | ---                  | <b>0.99</b>            | <b>0.89; 1.10</b> | <b>0.812</b>         | 0.99                   | 0.89; 1.10        | 0.857                | 0.97                   | 0.86; 1.10        | 0.641                | 0.98                   | 0.87; 1.11        | 0.803              |
|                                    | No More | ---                    | ---               | ---                  | <b>0.82</b>            | <b>0.72; 0.93</b> | <b>0.003*</b>        | 0.86                   | 0.75; 0.98        | 0.02                 | 0.87                   | 0.75; 1.01        | 0.068                | 0.90                   | 0.78; 1.05        | 0.183              |
| Delivery in Public Health Facility |         |                        |                   |                      |                        |                   |                      |                        |                   |                      |                        |                   |                      |                        |                   |                    |
|                                    | Yes     | ---                    | ---               | ---                  | ---                    | ---               | ---                  | <b>1.00</b>            | ---               | ---                  | 1.00                   | ---               | ---                  | 1.00                   | ---               | ---                |
|                                    | No      | ---                    | ---               | ---                  | ---                    | ---               | ---                  | <b>0.87</b>            | <b>0.70; 1.08</b> | <b>0.213</b>         | 1.11                   | 0.82; 1.50        | 0.504                | 1.01                   | 0.75; 1.35        | 0.964              |
| C-Section                          |         |                        |                   |                      |                        |                   |                      |                        |                   |                      |                        |                   |                      |                        |                   |                    |
|                                    | No      | ---                    | ---               | ---                  | ---                    | ---               | ---                  | <b>1.00</b>            | ---               | ---                  | 1.00                   | ---               | ---                  | 1.00                   | ---               | ---                |
|                                    | Yes     | ---                    | ---               | ---                  | ---                    | ---               | ---                  | <b>1.12</b>            | <b>1.02; 1.23</b> | <b>0.019*</b>        | 1.14                   | 1.02; 1.26        | 0.019                | 1.04                   | 0.93; 1.16        | 0.469              |
| Number Prenatal Visits             |         |                        |                   |                      |                        |                   |                      |                        |                   |                      |                        |                   |                      |                        |                   |                    |
|                                    | 4-9     | ---                    | ---               | ---                  | ---                    | ---               | ---                  | <b>1.00</b>            | ---               | ---                  | 1.00                   | ---               | ---                  | 1.00                   | ---               | ---                |
|                                    | 0-3     | ---                    | ---               | ---                  | ---                    | ---               | ---                  | <b>0.87</b>            | <b>0.75; 1.02</b> | <b>0.086</b>         | 0.89                   | 0.74; 1.08        | 0.242                | 0.90                   | 0.75; 1.07        | 0.234              |
|                                    | 10+     | ---                    | ---               | ---                  | ---                    | ---               | ---                  | <b>1.04</b>            | <b>0.88; 1.25</b> | <b>0.625</b>         | 1.06                   | 0.89; 1.26        | 0.514                | 1.00                   | 0.85; 1.19        | 0.972              |
| Low Birth Weight                   |         |                        |                   |                      |                        |                   |                      |                        |                   |                      |                        |                   |                      |                        |                   |                    |
|                                    | No      | ---                    | ---               | ---                  | ---                    | ---               | ---                  | ---                    | ---               | ---                  | <b>1.00</b>            | ---               | ---                  | 1.00                   | ---               | ---                |
|                                    | Yes     | ---                    | ---               | ---                  | ---                    | ---               | ---                  | ---                    | ---               | ---                  | <b>0.79</b>            | <b>0.60; 1.04</b> | <b>0.089</b>         | 0.76                   | 0.57; 1.00        | 0.054              |
| Infant Sex                         |         |                        |                   |                      |                        |                   |                      |                        |                   |                      |                        |                   |                      |                        |                   |                    |
|                                    | Male    | ---                    | ---               | ---                  | ---                    | ---               | ---                  | ---                    | ---               | ---                  | ---                    | ---               | ---                  | ---                    | ---               | ---                |
|                                    | Female  | ---                    | ---               | ---                  | ---                    | ---               | ---                  | ---                    | ---               | ---                  | <b>0.93</b>            | <b>0.83; 1.04</b> | <b>0.192</b>         | 0.93                   | 0.84; 1.04        | 0.205              |
| First Child                        |         |                        |                   |                      |                        |                   |                      |                        |                   |                      |                        |                   |                      |                        |                   |                    |
|                                    | Not 1st | ---                    | ---               | ---                  | ---                    | ---               | ---                  | ---                    | ---               | ---                  | ---                    | ---               | ---                  | ---                    | ---               | ---                |
|                                    | 1st     | ---                    | ---               | ---                  | ---                    | ---               | ---                  | ---                    | ---               | ---                  | <b>1.01</b>            | <b>0.90; 1.14</b> | <b>0.876</b>         | 1.00                   | 0.88; 1.12        | 0.936              |
| Prelacteal Feeds                   |         |                        |                   |                      |                        |                   |                      |                        |                   |                      |                        |                   |                      |                        |                   |                    |
|                                    | No      | ---                    | ---               | ---                  | ---                    | ---               | ---                  | ---                    | ---               | ---                  | ---                    | ---               | ---                  | <b>1.00</b>            | ---               | ---                |
|                                    | Yes     | ---                    | ---               | ---                  | ---                    | ---               | ---                  | ---                    | ---               | ---                  | ---                    | ---               | ---                  | <b>1.51</b>            | <b>1.37; 1.68</b> | <b>&lt;0.001**</b> |

<sup>a</sup> Model 1: income quintile, number of adults in household, and infant age.

<sup>b</sup> Model 2: Model 1 + mother living with partner, maternal overweight/obese, and pregnancy intention.

<sup>c</sup> Model 3: Model 2 + delivery in public health facility, c-section, and number of prenatal visits.

<sup>d</sup> Model 4: Model 3 + low infant birth weight, infant sex, and maternal primiparity.

<sup>e</sup> Model 5: Model 4 + prelacteal feeds.

\*Significant at p <0.05

\*\*Significant at p <0.001

--- Reference category; no prevalence ratios or CI calculated.
